# Supplementary material for: Tacrolimus- and sirolimus-induced human β cell dysfunction is reversible and preventable
Source: JCI journal article supplement (doi:10.1172/jci.insight.130770), 2020-01-15
Supplement: sd1 [file 1]

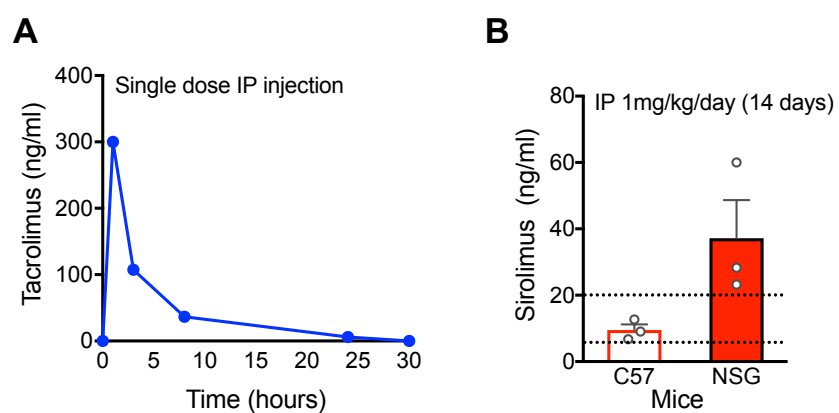

**Figure S1. Pharmacokinetics of TAC and SIR *in vivo*** Time course of TAC blood levels with single dose (0.25mg/kg) injection in NSG mice to establish drug half-life (A). Comparison of the SIR blood levels in C57BL/6 and NSG mice (B, n=3/group). Data represent mean  $\pm$  SEM.

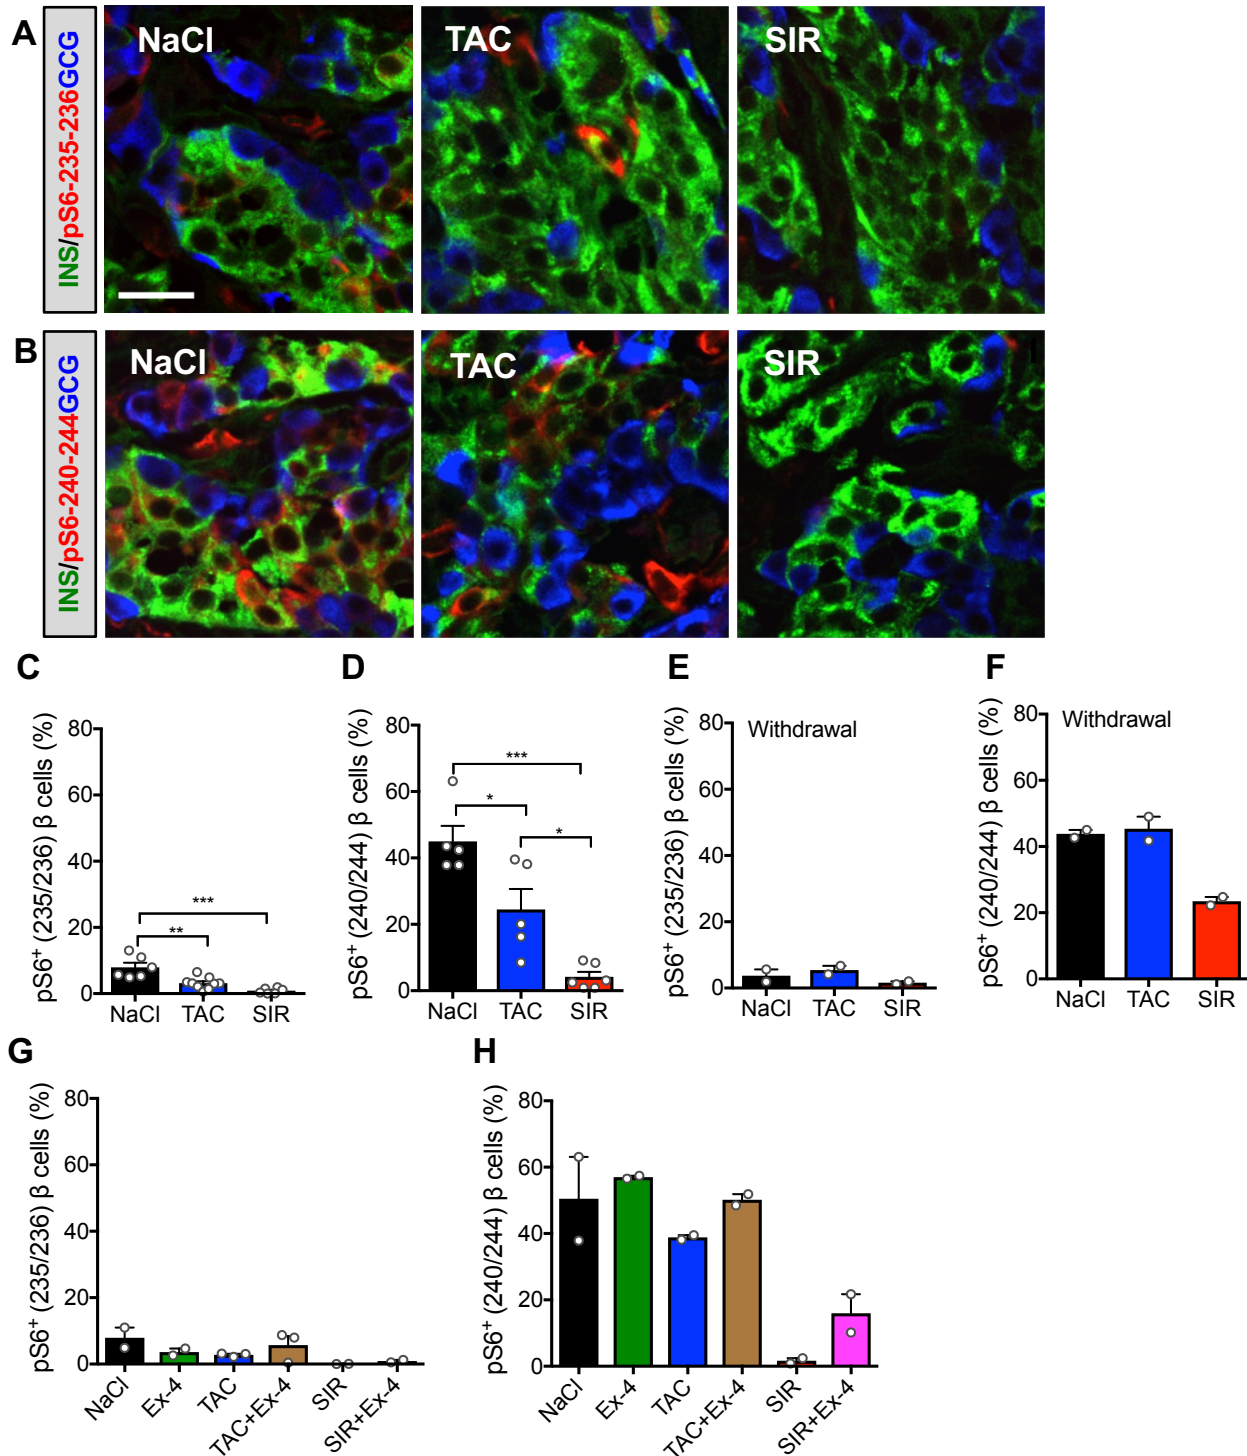

**Figure S2. TAC and SIR treatment reduces S6 phosphorylation in human grafts.** Representative images (A-B) of human grafts labeled with INS (green), pS6-235/236 or 240/244 (red), GCG (blue). Scale bar=20  $\mu$ m and applies to all images in (A) and (B). % of positive pS6  $\beta$  cells in human grafts (C-D, n=6-9 grafts/treatment from 3 donors, #3, #5, #7). % of positive pS6  $\beta$  cells in human grafts after 4 weeks withdrawal (E-F, n=2 grafts/treatment from donor #7). % of positive pS6  $\beta$  cells in human grafts with Ex-4 cotreatment (G,H, n=2-3 grafts/treatment from donor #5). \*  $p < 0.05$ , \*\*  $p < 0.01$ , \*\*\*  $p < 0.001$ . Data represent mean  $\pm$  SEM. One-way ANOVA was used for analysis of statistical significance.

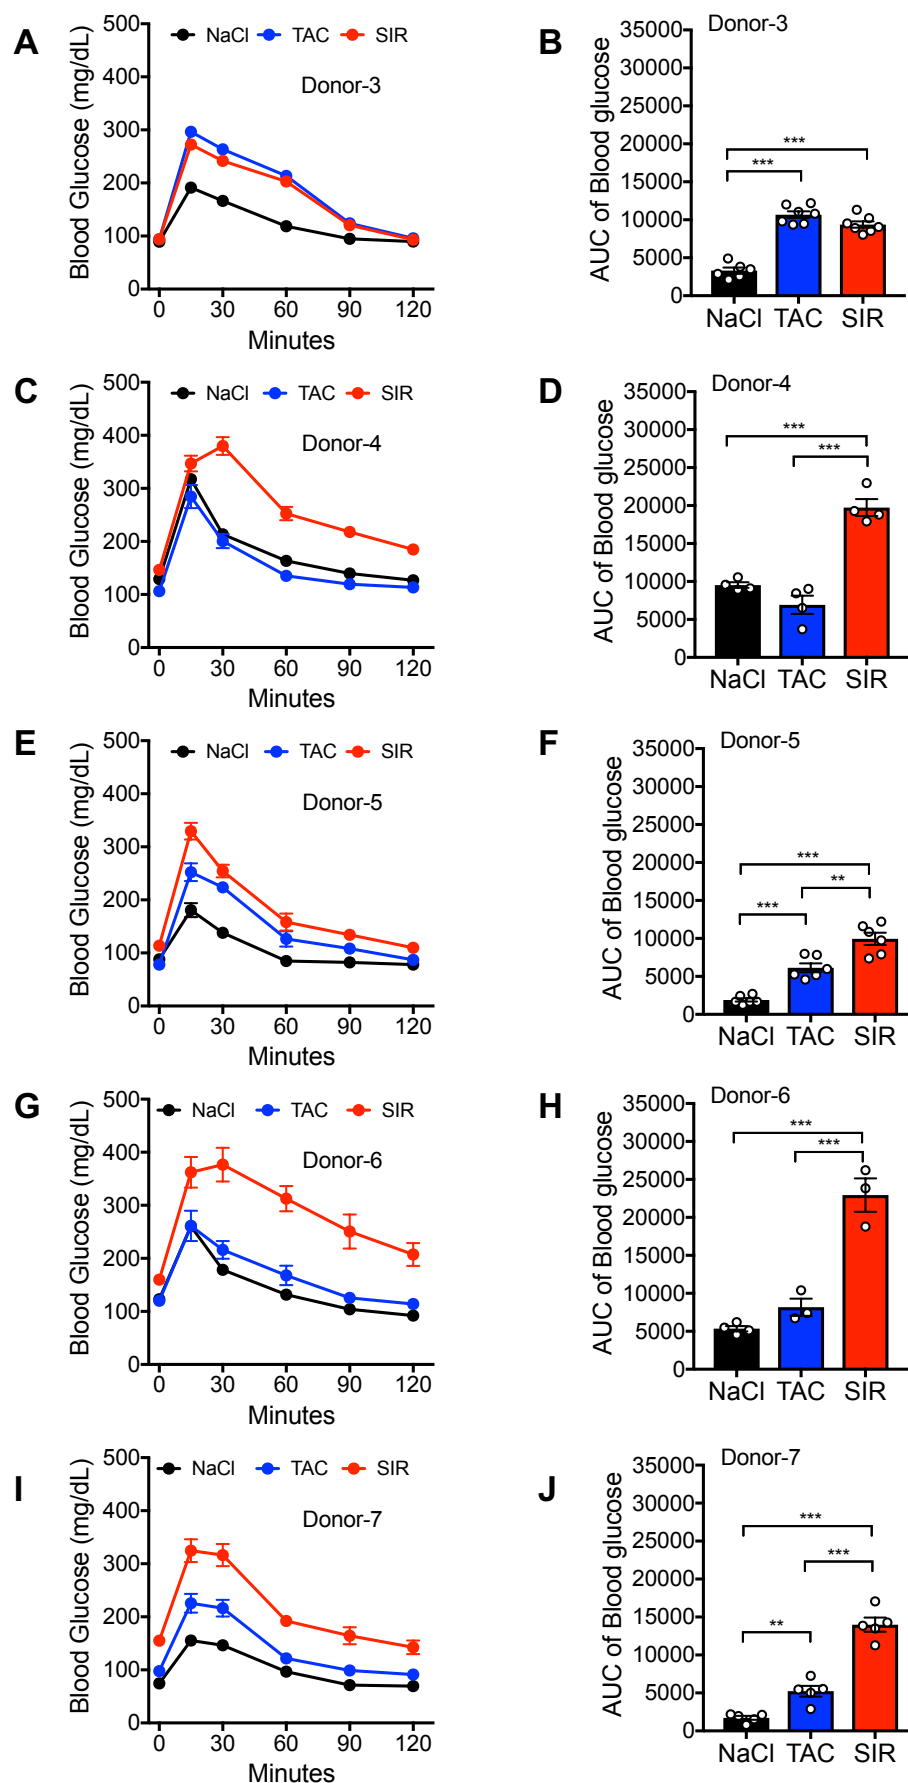

**Figure S3. Glucose tolerance test by individual donor in mice transplanted with human islets.** GTT (A,C,E,G,I) or AUC (B,D,F,H,J) shown by donor; corresponds to Fig. 1D-E. n=3-7 samples/treatment/donor. GTTs were not performed in mice from Donor-1 or Donor-2.

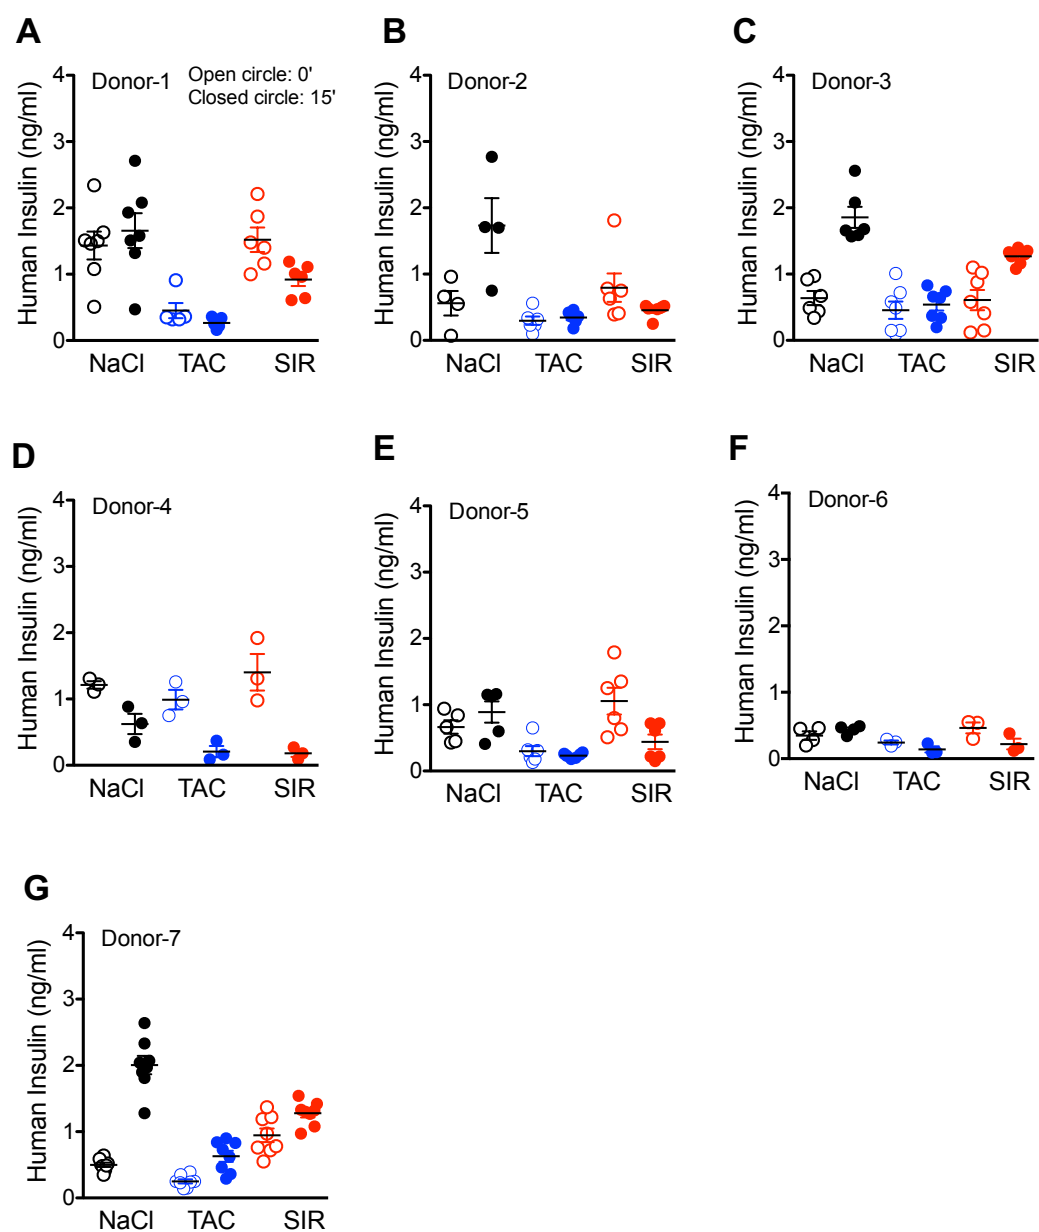

**Figure S4. Effects of TAC and SIR treatment for 4 weeks.** Data corresponds to Fig. 1G,J. Human insulin levels before and after stimulation from individual donors with TAC or SIR treatment for 4 weeks. n=3-8 serum samples/treatment/donor, donors #1-7.

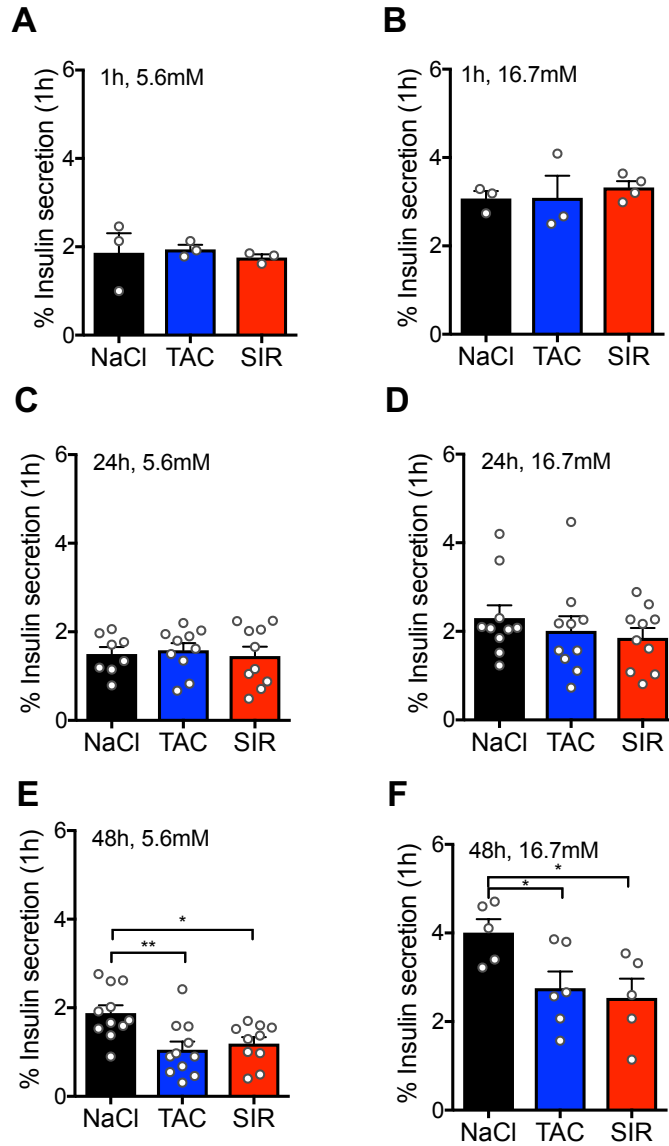

**Figure S5. The effect of TAC and SIR on human  $\beta$  cell function in vitro.** Insulin levels after human islets cultured with TAC or SIR for 1 hour (A-B, n=3 samples/treatment from donor #8), 24 hours (C-D, n=8-10 samples/treatment from donor #9,10,11), or 48 hours (E-F, n=10-11 samples/treatment from donor #9,10,11) with 5.6mM or 16.7mM glucose. \*  $p < 0.05$ , \*\*  $p < 0.01$ . Data represent mean  $\pm$  SEM. One-way ANOVA was used for analysis of statistical significance.

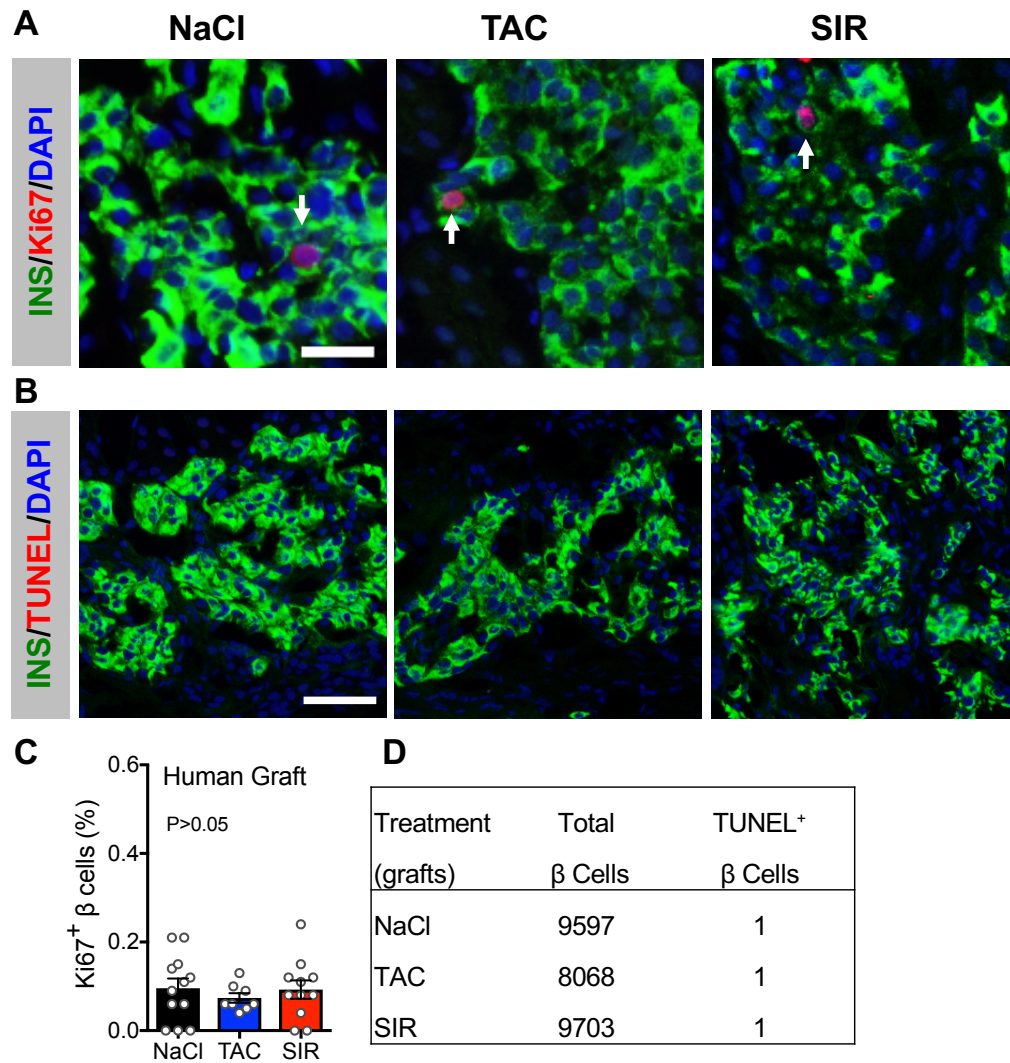

**Figure S6. TAC or SIR treatment do not change in vivo human β cell proliferation or apoptosis.**(A) Representative images of Ki67 assay in human grafts after 4 weeks treatment with insulin (green), Ki67 (red), and DAPI (blue). Arrows showed Ki67 positive β cells. Scale bar: 25 μm applies to all images in (A). (B) Representative images of TUNEL assay in human grafts after 4 weeks treatment with insulin (green), TUNEL (red), and DAPI (blue). Scale bar: 50 μm applies to all images in (B). (C) Percentage of Ki67 positive β cells in transplanted human grafts (n=8-12 grafts/treatment from donors #1, #3, #5). (D) Quantification of TUNEL positive β cells (donor #3, #4 and #5). Data represent mean ± SEM. One way ANOVA was used for analysis of statistical significance.

**A**

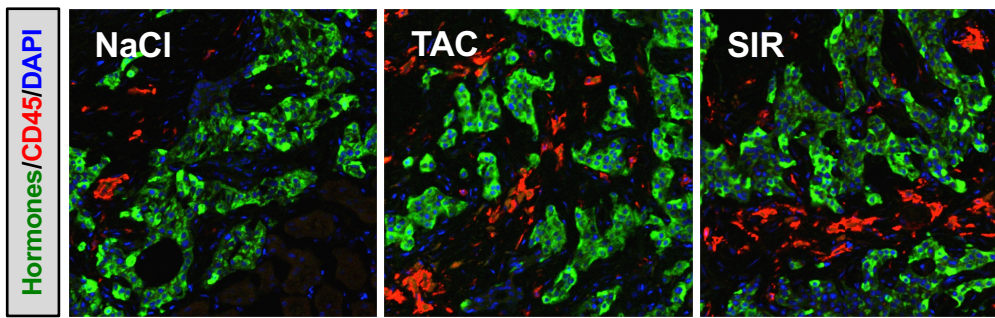

**B**

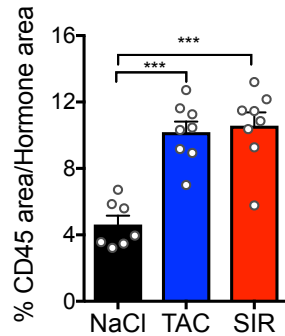

**C**

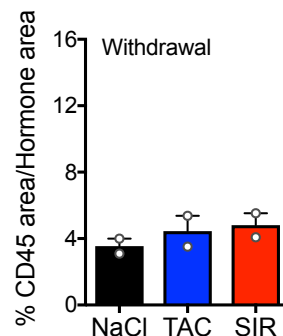

**D**

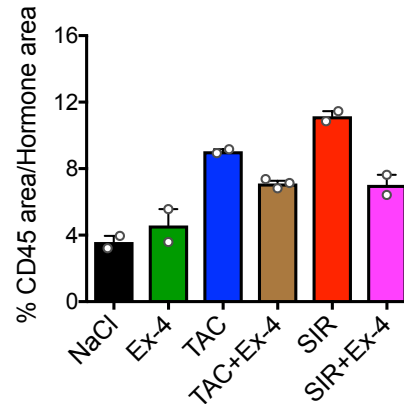

**E**

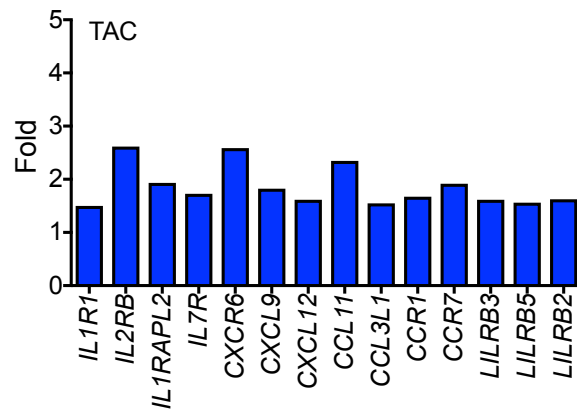

**F**

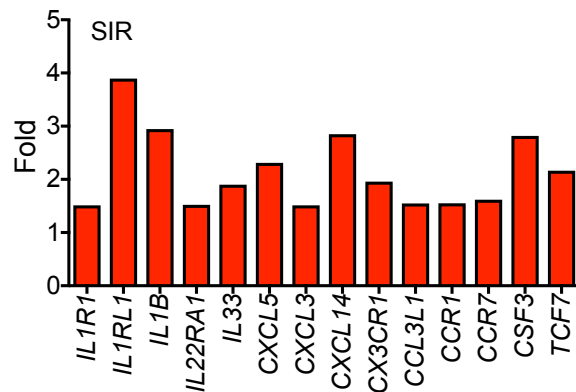

**Figure S7. TAC and SIR increase CD45<sup>+</sup> cells in human grafts.** Representative images (A) of CD45<sup>+</sup> cells in human grafts with green (INS, GCG, SOM), red (CD45) and blue (DAPI). Quantification % of CD45 area after TAC and SIR treatment for 4 weeks (B, n=7-8 grafts/treatment from 3 donors, #3,#5,#7), 4 weeks withdrawal (C, n=2 grafts/treatment from donor #7) or with Ex-4 treatment (D, n=2-3 grafts/treatment from donor #5). (E, F) RNAseq data from human graft samples. Fold change transcripts related to inflammation stimulated by TAC (E) and SIR (F) compared to control group (n=5 samples from 2 donor transplantations). \* p<0.05, \*\* p<0.01, \*\*\* p<0.001. Data represent mean  $\pm$  SEM. One-way ANOVA was used for analysis of statistical significance.



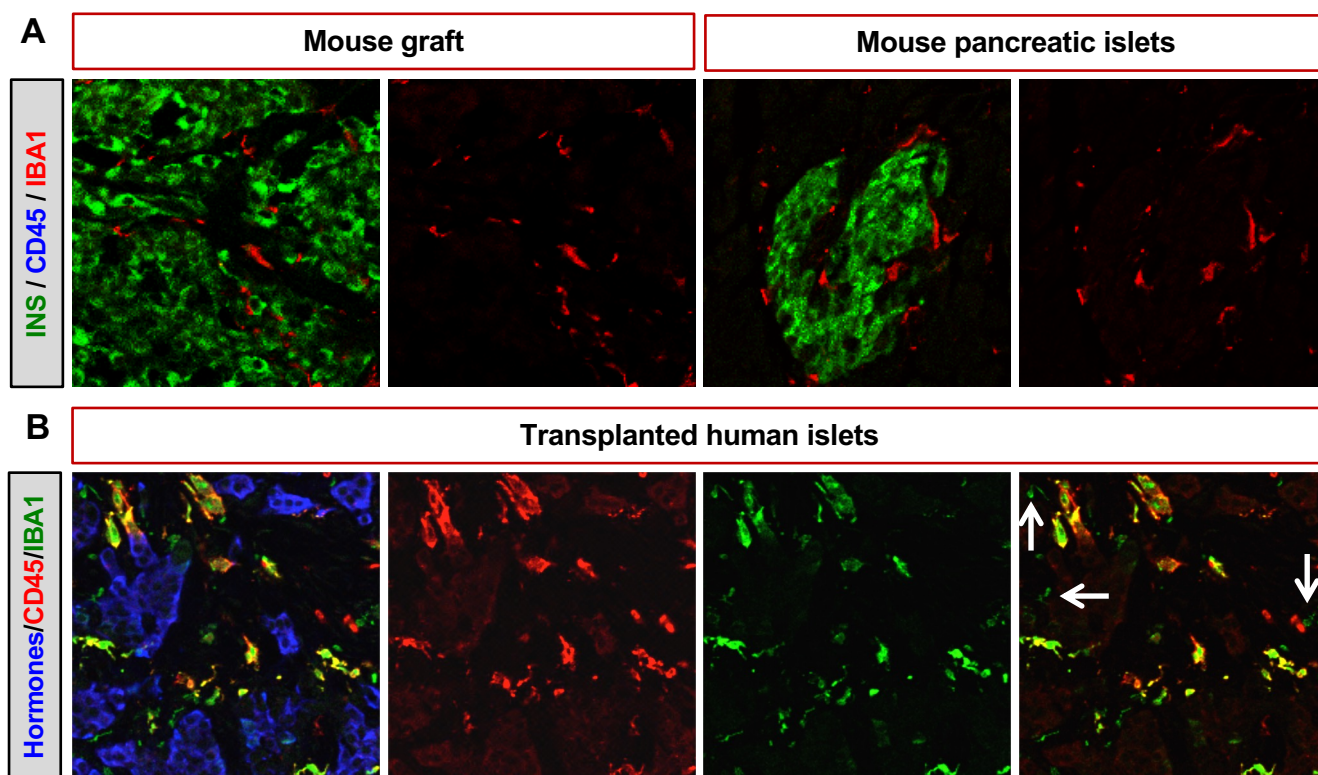

**Figure S8. CD45<sup>+</sup> cells in human grafts were derived from human.** (A) Images showing macrophages in mouse grafts or mouse pancreatic islets, green (INS), red (IBA1, antibody reacts with human and mouse macrophages), blue (CD45, reacts only to human tissue, negative in both mouse graft and mouse pancreatic islet). (B) Macrophages in human graft derived from human (co-labeled CD45 and IBA1, yellow) and mouse (IBA1 only, green, pointed with arrows): blue (INS, GCG, and SOM), red (CD45), green (IBA1).



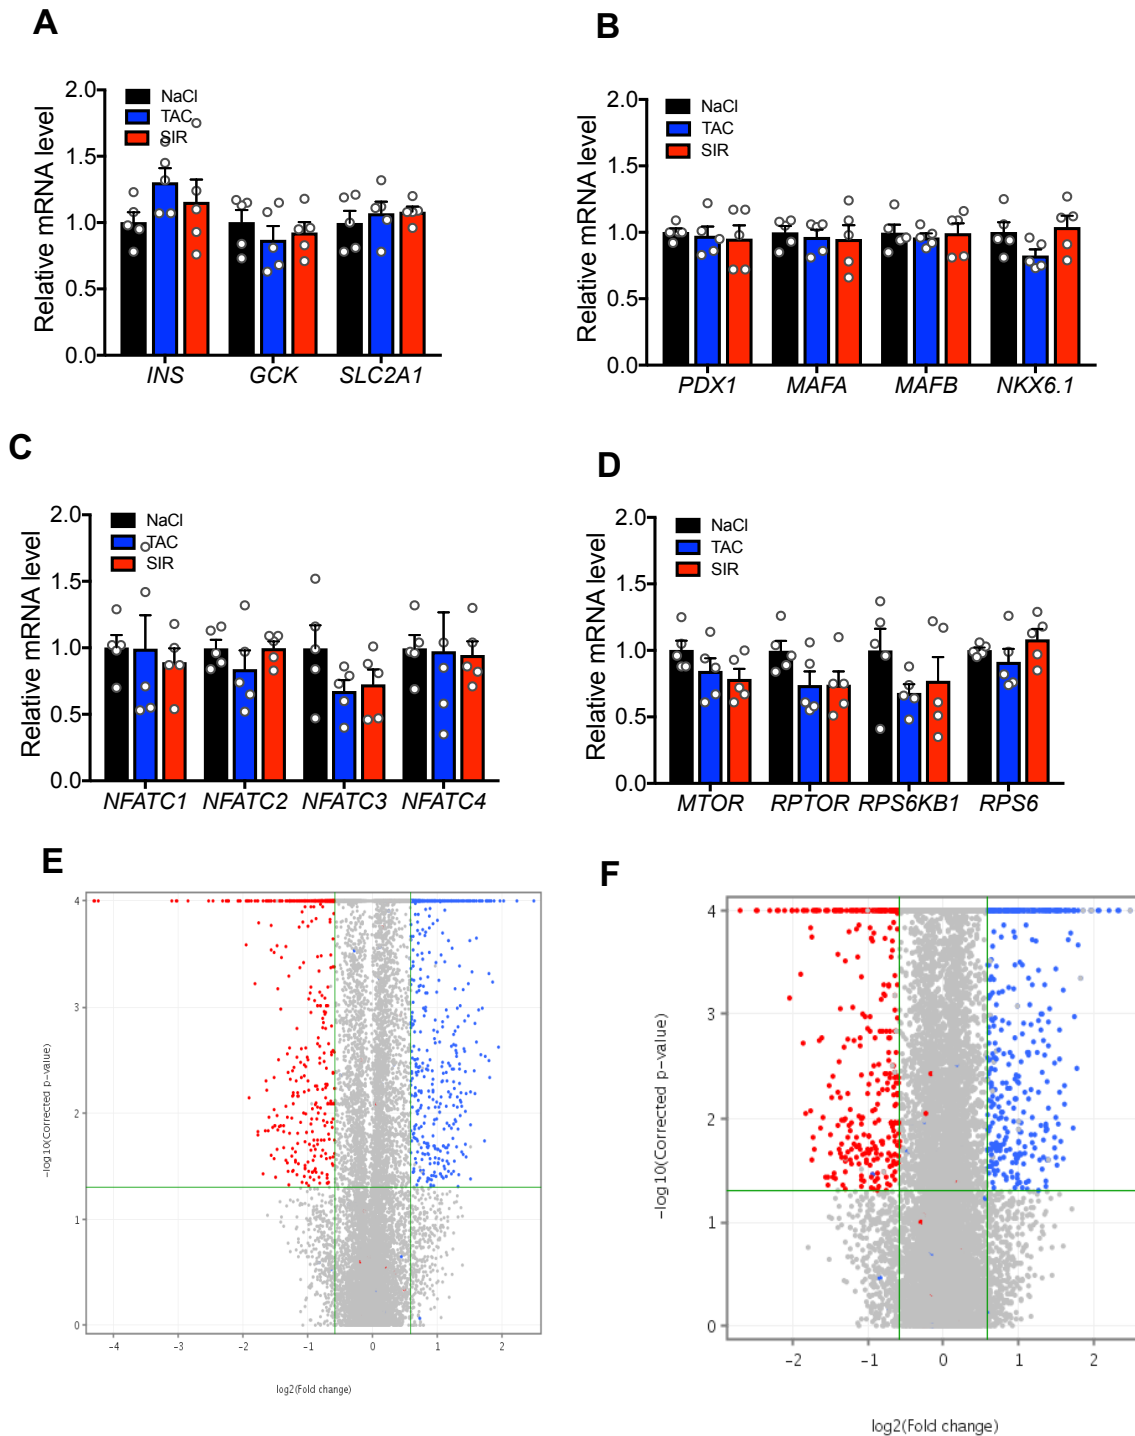

**Figure S9. Gene expression in human grafts measured by quantitative real-time RT-PCR (qPCR).**

Genes are grouped by (A)  $\beta$  cell metabolism, (B)  $\beta$  cell enriched transcription factors, (C) the NFATC family, and (D) mTOR signaling. n=5 grafts/treatment from donor #3 and #5. Volcano plots of RNAseq data, TAC vs PBS (E) and SIR vs PBS (F).

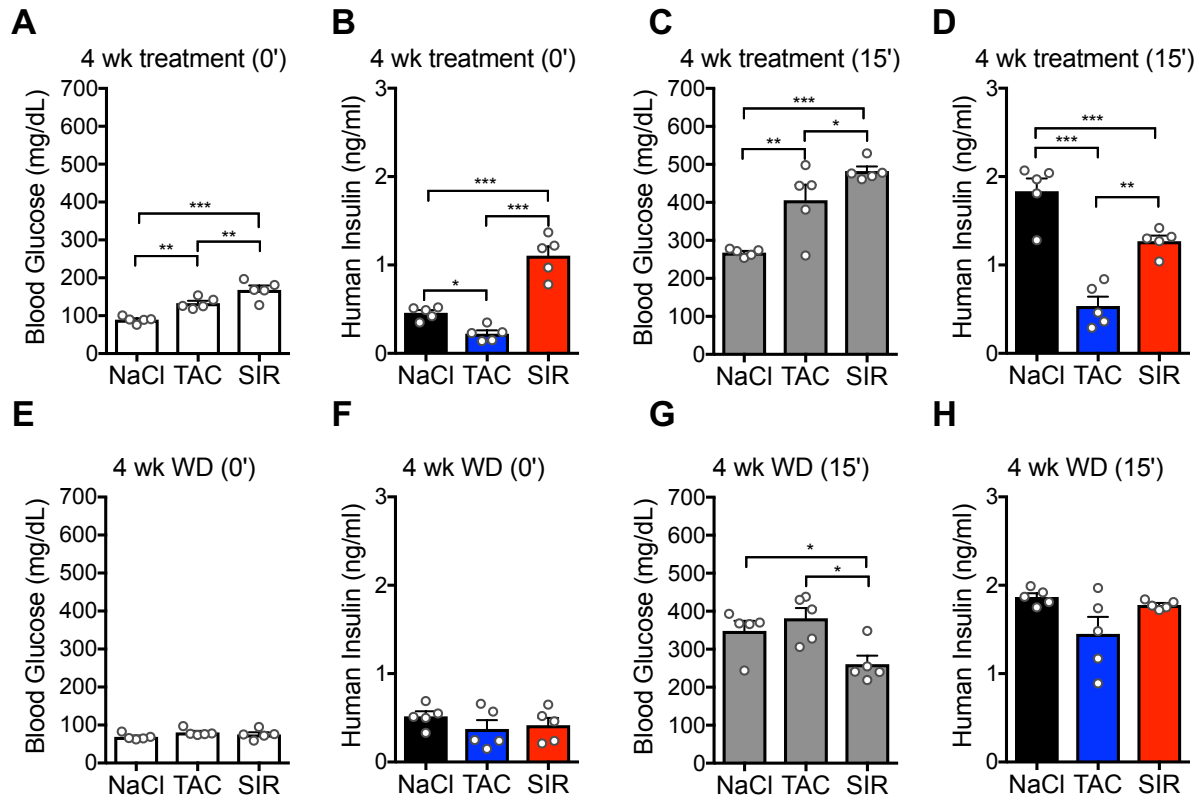

**Figure S10. The changes of blood glucose and human insulin levels induced by TAC or SIR are reversed after 4 weeks of withdrawal (donor #7).** Fasted and stimulated blood glucose and human insulin analyses after 4 weeks of drug treatment (A-D; corresponds to Fig 3D-E). Fasted and stimulated blood glucose and human insulin analyses after 4 weeks drug withdrawal (E-H; corresponds to Fig 3H-I). \* p<0.05, \*\* p<0.01, \*\*\* p<0.001. Data represent mean  $\pm$  SEM. One-way ANOVA was used for analysis of statistical significance.

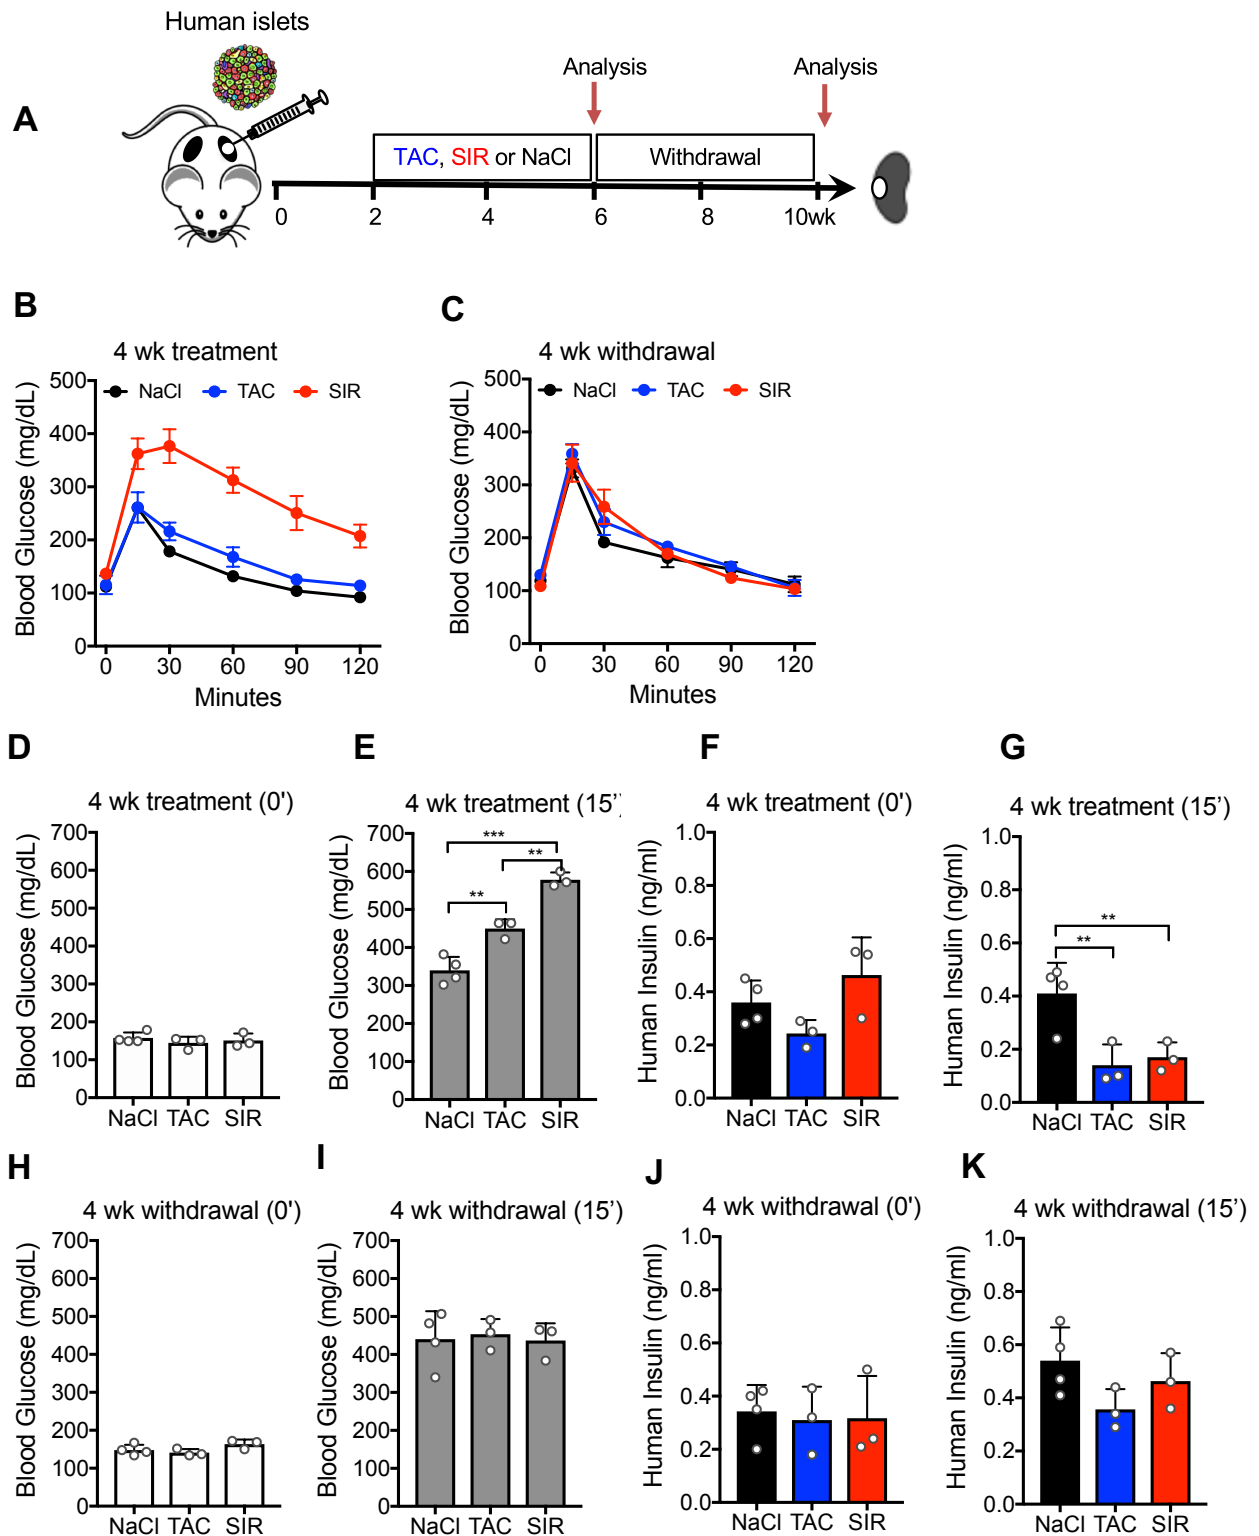

**Figure S11. Impaired  $\beta$  cell function by either TAC or SIR normalizes after 4 weeks of withdrawal (Donor #6).** Schematic of experimental design (A). Mice were given NaCl, TAC or SIR for 4 weeks followed by withdrawal for 4 weeks. GTT after treatment with TAC or SIR for 4 weeks (B) or 4 weeks after withdrawal (C). Blood glucose and human at 0' and 15' of glucose-arginine stimulation after 4 weeks treatment (D-G) and then 4 weeks after withdrawal (H-K).  $n=3-4$  samples/treatment. \*  $p<0.05$ , \*\*  $p<0.01$ , \*\*\*  $p<0.001$ . Data represent mean  $\pm$  SEM. One-way ANOVA was used for analysis of statistical significance.

### Checklist for reporting human islet preparations used in research

Adapted from Hart NJ, Powers AC (2019) Progress, challenges, and suggestions for using human islets to understand islet biology and human diabetes. Diabetologia <https://doi.org/10.1007/s00125-018-4772-2> and Poitout V, Satin LS, Kahn SE, et al (2019) A call for improved reporting of human islet characteristics in research articles. Diabetologia and Diabetes. <https://doi.org/10.2337/dbi18-0055>

**Supplemental Table 1. Human Islet Donor Information**

| Islet preparation              | 1           | 2           | 3        | 4     | 5          | 6        | 7           | 8           |
|--------------------------------|-------------|-------------|----------|-------|------------|----------|-------------|-------------|
| Unique identifier              | 08785748    | 08784318    | 08774468 | DON61 | 08930707   | DON75    | 08768702    | 08769130    |
| Donor age (years)              | 46          | 43          | 44       | 55    | 55         | 16       | 59          | 37          |
| Donor sex (M/F)                | M           | M           | F        | M     | M          | M        | F           | M           |
| Donor BMI (kg/m <sup>2</sup> ) | 24.3        | 29.6        | 23.8     | 35.6  | 27.8       | 23.0     | 22.0        | 27.6        |
| Donor HbA1C                    | N/A         | N/A         | N/A      | N/A   | 4.9        | 5.0      | 5.2         | N/A         |
| Origin/source of islets        | IIDP        | IIDP        | IIDP     | AHN   | IIDP       | AHN      | IIDP        | IIDP        |
| Islet isolation centre         | U Penn      | U Penn      | U Penn   | AHN   | U Illinois | AHN      | U Wisconsin | U Wisconsin |
| Donor history of diabetes?     | No          | No          | No       | No    | No         | No       | No          | No          |
| Donor cause of death           | Head Trauma | Head Trauma | CVA      | CVA   | CVA        | Overdose | CVA         | CVA         |
| Warm ischaemia time (h)        | N/A         | N/A         | N/A      | DBD   | N/A        | DBD      | N/A         | N/A         |
| Cold ischaemia time (h)        | 12.2        | 6.9         | 6.2      | 7.5   | 10.0       | 20.9     | 6.5         | 11.0        |
| Estimated purity (%)           | 80          | 90          | 90       | 70    | 90         | N/A      | 98          | 90          |
| Estimated viability (%)        | 95          | 91          | 95       | N/A   | 99         | N/A      | 95          | 95          |
| Total culture time (h)         | 27          | 16          | 43       | 36    | 24         | N/A      | 36          | 18          |

|                                                                      |            |            |            |            |            |            |            |            |
|----------------------------------------------------------------------|------------|------------|------------|------------|------------|------------|------------|------------|
| Glucose-stimulated insulin secretion or other functional measurement | Perifusion |
| Handpicked to purity?                                                | No         | Yes        |
| Experiment Used in                                                   | Transplant | In Vitro   |

| Islet preparation              | 9       | 10          | 11           |
|--------------------------------|---------|-------------|--------------|
| Unique identifier              | HPAP004 | DON160      | 08769035     |
| Donor age (years)              | 24      | 15          | 43           |
| Donor sex (M/F)                | F       | M           | M            |
| Donor BMI (kg/m <sup>2</sup> ) | 32.2    | 25.1        | 35.0         |
| Donor HbA1C                    | N/A     | 4.7         | N/A          |
| Origin/source of islets        | HPAP    | AHN         | IIDP         |
| Islet isolation centre         | U Penn  | AHN         | S California |
| Donor history of diabetes?     | No      | No          | No           |
| Donor cause of death           | Anoxia  | Head Trauma | CVA          |
| Warm ischaemia time (h)        | N/A     | DBD         | N/A          |
| Cold ischaemia time (h)        | 9.0     | 11.5        | N/A          |
| Estimated purity (%)           | 95      | 70          | 85           |
| Estimated viability (%)        | 90      | 85          | 96           |

|                                                                      |            |            |            |
|----------------------------------------------------------------------|------------|------------|------------|
| Total culture time (h)                                               | 87         | 18         | 67         |
| Glucose-stimulated insulin secretion or other functional measurement | Perifusion | Perifusion | Perifusion |
| Handpicked to purity?                                                | Yes        | Yes        | Yes        |
| Experiment Used in                                                   | In Vitro   | In Vitro   | In Vitro   |

Abbreviations: N/A – Not available, IIDP – Integrated Islet Distribution Program, AHN – Allegheny Health Network, CVA – cerebrovascular accident (stroke), DBD – donation after brain death (warm ischemia time essentially 0 hours).



**Supplemental Table 2: Percent of Amyloid/insulin area per graft – raw data**

|                | -----4 week treatment----- |      |      |      |          |          | 4 week withdrawal |      |      |
|----------------|----------------------------|------|------|------|----------|----------|-------------------|------|------|
|                | NaCl                       | TAC  | SIR  | Ex-4 | TAC+Ex-4 | SIR+Ex-4 | NaCl              | TAC  | SIR  |
| <b>Donor 3</b> | 0.48                       | 1.40 | 1.23 |      |          |          |                   |      |      |
|                | 0.43                       | 1.64 | 1.55 |      |          |          |                   |      |      |
|                |                            | 1.50 | 1.51 |      |          |          |                   |      |      |
| <b>Donor 4</b> | 0.32                       | 0.69 | 0.50 | 0.23 | 0.38     | 0.21     |                   |      |      |
| <b>Donor 5</b> | 2.85                       | 5.00 | 7.62 | 2.52 | 1.82     | 6.26     |                   |      |      |
|                | 2.50                       | 6.16 | 8.46 | 2.03 | 2.53     | 4.67     |                   |      |      |
|                |                            |      |      |      | 1.87     | 3.37     |                   |      |      |
| <b>Donor 6</b> | 0.38                       | 0.83 | 0.84 |      |          |          | 0.32              | 0.52 | 0.31 |
|                | 0.28                       | 0.71 | 0.71 |      |          |          | 0.49              | 0.42 | 0.37 |
| <b>Donor 7</b> | 1.17                       | 2.34 | 2.86 |      |          |          | 1.93              | 2.68 | 2.57 |
|                | 0.95                       | 2.05 | 3.83 |      |          |          | 2.05              | 2.49 | 3.06 |
|                | 1.08                       | 1.98 | 5.38 |      |          |          |                   |      |      |

Thioflavin S area expressed at a percent of insulin area for 5-6 sections per graft shows varying baseline amyloid formation by donor. Data from columns 1-3 (donors 3-7) is included in Figure 1, columns 1-3 and 7-9 for donors 6 and 7 is included in Figure 2, and columns 1-6 for donors 4 and 5 is included in Figure 3.

**Supplemental Table 5. Full statistical analysis of Figure 4C-F and H**

|                         | AUC | Blood<br>Glucose | Human<br>Insulin | H Ins/Glucose<br>Ratio | Amyloid<br>/Ins area |
|-------------------------|-----|------------------|------------------|------------------------|----------------------|
| NaCl vs Ex-4            | ns  | ns               | ns               | ns                     | ns                   |
| NaCl vs TAC             | ns  | ns               | **               | *                      | ns                   |
| NaCl vs TAC+Ex-4        | ns  | ns               | ns               | ns                     | ns                   |
| NaCl vs SIR             | *** | **               | ns               | ns                     | *                    |
| NaCl vs SIR+Ex-4        | **  | ns               | ns               | ns                     | ns                   |
| Ex-4 vs TAC             | ns  | ***              | ***              | ***                    | *                    |
| Ex-4 vs TAC+Ex-4        | ns  | ns               | ns               | ns                     | ns                   |
| Ex-4 vs SIR             | *** | ***              | *                | ***                    | **                   |
| Ex-4 vs SIR+Ex-4        | **  | ***              | ns               | **                     | ns                   |
| TAC vs TAC+Ex-4         | ns  | ns               | *                | *                      | *                    |
| TAC vs SIR              | **  | ns               | ns               | ns                     | ns                   |
| TAC vs SIR+Ex-4         | ns  | ns               | ns               | ns                     | ns                   |
| TAC+Ex-4 vs SIR         | *** | **               | ns               | ns                     | **                   |
| TAC+Ex-4 vs<br>SIR+Ex-4 | ns  | ns               | ns               | ns                     | ns                   |
| SIR vs SIR+Ex-4         | ns  | ns               | ns               | ns                     | ns                   |

Groups compared by One-way ANOVA followed by Tukey multiple comparisons test. ns  $p > 0.05$ , \*  $p < 0.05$ , \*\*  $p < 0.01$ , \*\*\*  $p < 0.001$

**Supplemental Table 6: Primary antibodies**

| <b>Antigen</b> | <b>Host</b> | <b>Class</b> | <b>Source</b>  | <b>Catalog #</b> |
|----------------|-------------|--------------|----------------|------------------|
| Insulin        | Guinea Pig  | polyclonal   | Dako           | A0564            |
| Glucagon       | mouse       | monoclonal   | abcam          | ab10988          |
| Glucagon       | Rabbit      | polyclonal   | Cell Signaling | 2760             |
| Somatostatin   | Goat        | polyclonal   | Santa Cruz BT  | sc-7819          |
| Ki-67          | Rabbit      | polyclonal   | abcam          | ab-15580         |
| SER235/236     | Rabbit      | monoclonal   | Cell Signaling | 4858s            |
| SER240/244     | Rabbit      | monoclonal   | Cell Signaling | 5364s            |
| Iba1           | Rabbit      | polyclonal   | Wako           | 019-19741        |
| hCD45          | mouse       | monoclonal   | BD Pharmingen  | 347460           |

**Supplemental Table 7: Primers**

| <b>Gene Symbol</b> | <b>Catalog #</b> |
|--------------------|------------------|
| <i>INS</i>         | Hs02741908_m1    |
| <i>GCK</i>         | Hs01564555_m1    |
| <i>PDX1</i>        | Hs00236830_m1    |
| <i>MAFA</i>        | Hs01651425_s1    |
| <i>MAFB</i>        | Hs00534343_s1    |
| <i>NKX6.1</i>      | Hs00232355_m1    |
| <i>NFATC1</i>      | Hs00542678_m1    |
| <i>NFATC2</i>      | Hs00905451_m1    |
| <i>NFATC3</i>      | Hs00190046_m1    |
| <i>NFATC4</i>      | Hs00190037_m1    |
| <i>MTOR</i>        | Hs00234508_m1    |
| <i>RPTOR</i>       | Hs00375332_m1    |
| <i>RPS6KB1</i>     | Hs00356367_m1    |
| <i>RPS6</i>        | Hs04195024_g1    |
| <i>CHGA</i>        | Hs00900370_m1    |
| <i>TFRC</i>        | Hs00951083_m1    |
| <i>SV2A</i>        | Hs01059458_m1    |
